# Supplementary material for: First Record of Osphya (Melandryidae: Osphyinae) from Chinese Mainland Based on Morphological Evidence and Mitochondrial Genome-Based Phylogeny of Tenebrionoidea
Source: MDPI journal article supplement (doi:10.3390/d15020282), 2023-02-15
Supplement: s1 [file s1]

Supplementary files

# First Record of *Osphyra* (Melandryidae: Osphyinae) from Chinese Mainland Based on Morphological Evidence and Mitochondrial Genome-Based Phylogeny of Tenebrionoidea <sup>†</sup>

Haoyu Liu <sup>1</sup>, Lilan Yuan <sup>1,2</sup>, Ping Wang <sup>2</sup>, Zhao Pan <sup>1</sup>, Junbo Tong <sup>1</sup>, Gang Wu <sup>3,\*</sup> and Yuxia Yang <sup>1,\*</sup>

<sup>1</sup> Key Laboratory of Zoological Systematics and Application, School of Life Science, Institute of Life Science and Green Development, Hebei University, Baoding 071002, China

<sup>2</sup> College of Agriculture, Yangtze University, Jingzhou 434025, China

<sup>3</sup> College of Plant Science and Technology, Huazhong Agricultural University, Wuhan 430070, China

\* Correspondence: wugang@mail.hzau.edu.cn (G.W.); yxyang@hbu.edu.cn (Y.Y.)

<sup>†</sup> This published work and the nomenclatural acts it contains have been registered in ZooBank, the Online Registration System for the ICZN (International Code of Zoological Nomenclature). The LSID (Life Science Identifier) for This Publication is: LSID urn:lsid:zoobank.org:pub:5F023DB4-BA5A-40A7-99F6-8145BA71B6A7.

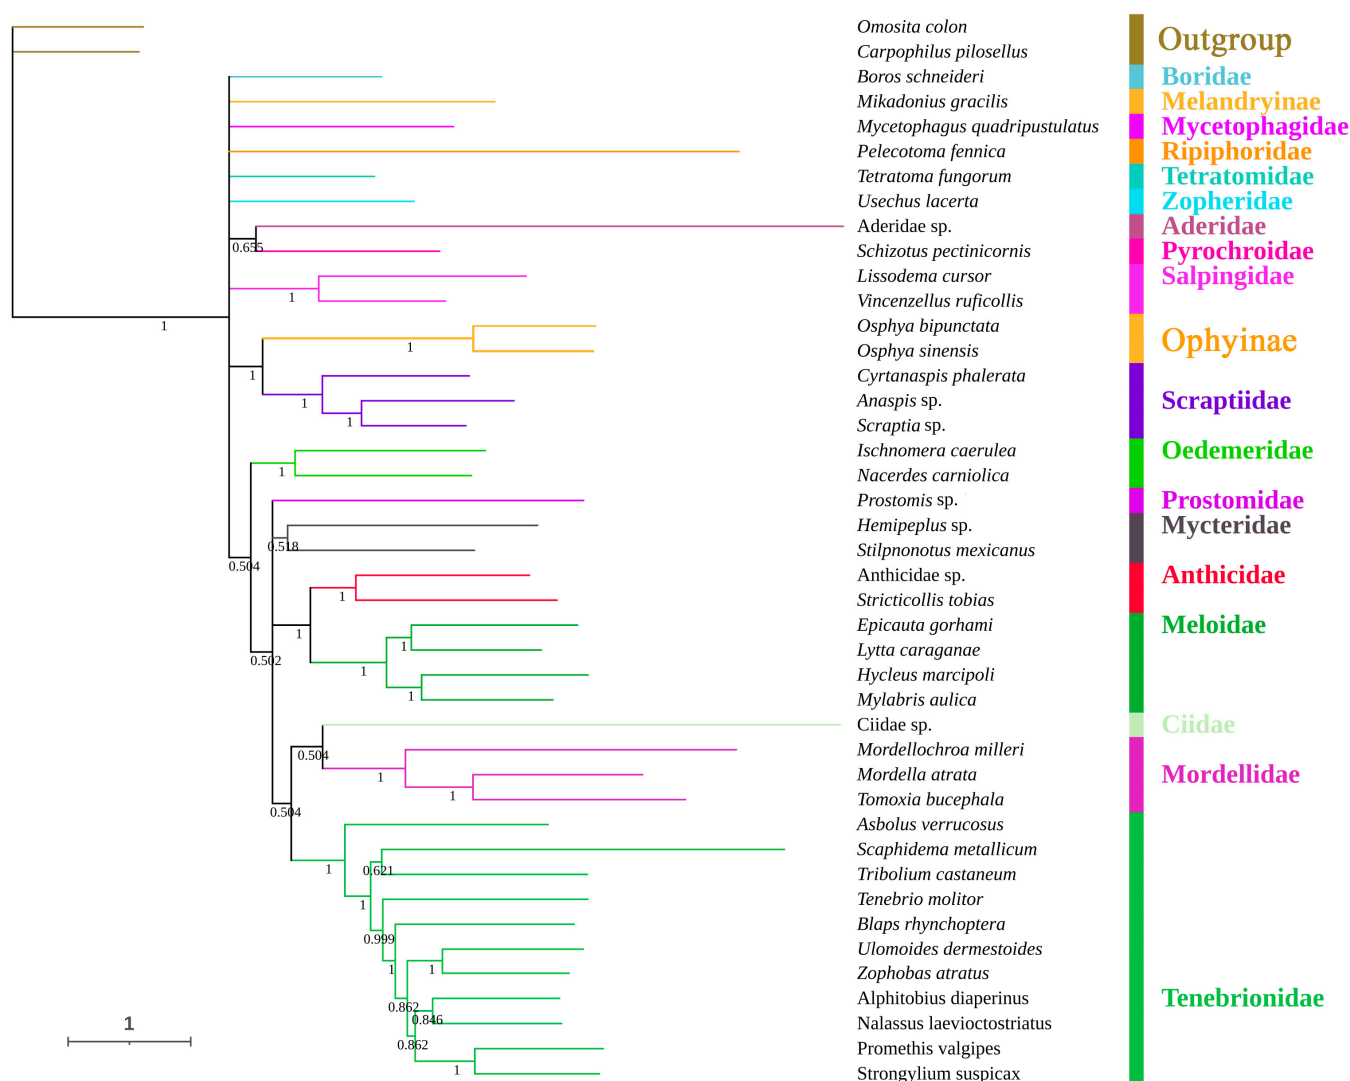

**Figure S1** Phylogenetic tree of Tenebrionoidea produced from BI analysis based on 13 PCGs (PP values indicated in each clade)

**Table S1** Distribution information of the *Osphya* species in the Oriental and eastern and southern Palaearctic regions.

| Species                                   | Distribution                                   | Longitude | Latitude | Source     |
|-------------------------------------------|------------------------------------------------|-----------|----------|------------|
| <i>Osphya formosana</i> Pic, 1927         | China: Taiwan                                  | 121.29578 | 24.99511 | [14]       |
| <i>Osphya trilineata</i> Pic, 1910        | China: Taiwan                                  | 121.29578 | 24.99511 | [10]       |
| <i>Osphya orientalis</i> (Lewis, 1895)    | Japan, Miyanoshta                              | 139.06054 | 35.23929 | [5]        |
|                                           | Japan, Nikko                                   | 139.54738 | 36.79846 | [5]        |
| <i>Osphya albofasciata</i> Champion, 1916 | India: Assam, Patkai Mts.                      | 95.99960  | 27.00004 | [7]        |
| <i>Osphya harmandi</i> Pic, 1926          | India: Sikkim                                  | 88.48946  | 27.21889 | [13]       |
|                                           | India: Darjeeling District                     | 88.27189  | 27.02923 | [13]       |
| <i>Osphya dissimilis</i> Champion, 1922   | India: Uttarakhand, Uttar pradesh              | 79.06097  | 30.14047 | [9]        |
| <i>Osphya nigriventris</i> Champion, 1920 | India: Uttarakhand, Uttar pradesh              | 79.06097  | 30.14047 | [8]        |
| <i>Osphya nigroapicalis</i> Pic, 1921     | India.                                         | 88.27189  | 27.02923 | [11]       |
| <i>Osphya nilgirica</i> Champion, 1916    | India: Nilgiri Hills                           | 76.76198  | 11.37447 | [7]        |
| <i>Osphya rufa</i> Pic, 1927b             | Vietnam: Chapa                                 | 103.96834 | 22.50462 | [15]       |
| <i>Osphya superba</i> Pic, 1927           | Vietnam: Chapa                                 | 103.96834 | 22.50462 | [15]       |
| <i>Osphya melina</i> Champion, 1916       | Myanmar: Tenasserim, Victoria Point.           | 98.55190  | 9.99258  | [7]        |
| <i>Osphya sinensis</i> sp. nov.           | China: Hubei, Shennongjia, Dajiuahu, Luoyanghe | 110.13778 | 31.57722 | This study |
|                                           | China: Hubei, Shennongjia, Dajiuahu, Dongxi    | 110.12194 | 31.53944 | —          |
|                                           | China: Hubei, Shennongjia, Muyu, Yanjiawan     | 110.43417 | 31.47722 | —          |
|                                           |                                                |           |          |            |

**Table S2** The best partitioning schemes and models for the Maximum Likelihood (ML) method

| Partitions | Models    | Genes     |
|------------|-----------|-----------|
| P1         | GTR+F+I+G | atp6      |
| P2         | TIM+F+I+G | atp8      |
| P3         | GTR+F+I+G | cox1,cox2 |
| P4         | GTR+F+I+G | cox3      |
| P5         | GTR+F+I+G | cytb      |
| P6         | GTR+F+I+G | nad1      |
| P7         | TIM+F+I+G | nad2      |
| P8         | TIM+F+I+G | nad3      |
| P9         | GTR+F+I+G | nad4L     |
| P10        | GTR+F+I+G | nad4,nad5 |
| P11        | TIM+F+I+G | nad6      |

**Table S3** The best partitioning schemes and models for the Bayesian Inference (BI) method

| Partitions | Models  | Genes                          |
|------------|---------|--------------------------------|
| P1         | GTR+I+G | atp6_pos1,cytb_pos1            |
| P2         | GTR+I+G | atp6_pos2                      |
| P3         | GTR+G   | atp6_pos3,atp8_pos3,nad3_pos3  |
| P4         | GTR+I+G | atp8_pos1,nad6_pos1            |
| P5         | GTR+I+G | atp8_pos2,nad2_pos2,nad3_pos2  |
| P6         | GTR+I+G | cox1_pos1,                     |
| P7         | GTR+I+G | cox1_pos2                      |
| P8         | GTR+I+G | cox1_pos3                      |
| P9         | GTR+I+G | cox2_pos1, cox3_pos2           |
| P10        | GTR+I+G | cox2_pos2                      |
| P11        | HKY+G   | cox2_pos3                      |
| P12        | GTR+I+G | cox3_pos2                      |
| P13        | GTR+G   | cox3_pos3,cybt_pos3            |
| P14        | GTR+I+G | cytb_pos2                      |
| P15        | GTR+I+G | nad1_pos1                      |
| P16        | GTR+I+G | nad1_pos2                      |
| P17        | GTR+G   | nad1_pos3                      |
| P18        | GTR+I+G | nad2_pos1                      |
| P19        | HKY+G   | nad2_pos3                      |
| P20        | GTR+I+G | nad3_pos1                      |
| P21        | GTR+I+G | nad4L_pos1,nad5_pos1           |
| P22        | GTR+G   | nad4L_pos2                     |
| P23        | GTR+I+G | nad5_pos3,nad4L_pos3,nad4_pos3 |
| P24        | GTR+I+G | nad4_pos1                      |
| P25        | GTR+I+G | nad5_pos2,nad4_pos2,           |
| P26        | GTR+I+G | nad6_pos2                      |
| P27        | HKY+G   | nad6_pos3                      |
